# Supplementary material for: Synthesis and structural characterization of novel tetranuclear organotitanoxane derivatives
Source: Royal Society of Chemistry journal article supplement (doi:10.1039/c0dt01393e), 2011-01-01
Supplement: c0dt01393e.pdf [file c0dt01393e.pdf]

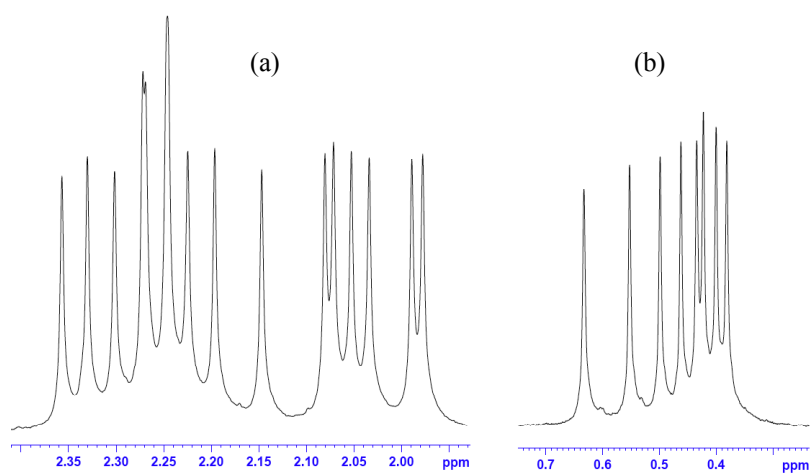

**Figure 1.**  $^1\text{H}$ -NMR spectrum of **4** in  $\text{CDCl}_3$ , showing the regions of the *Me*-Cp protons (a) and the *Me*-Si protons (b).

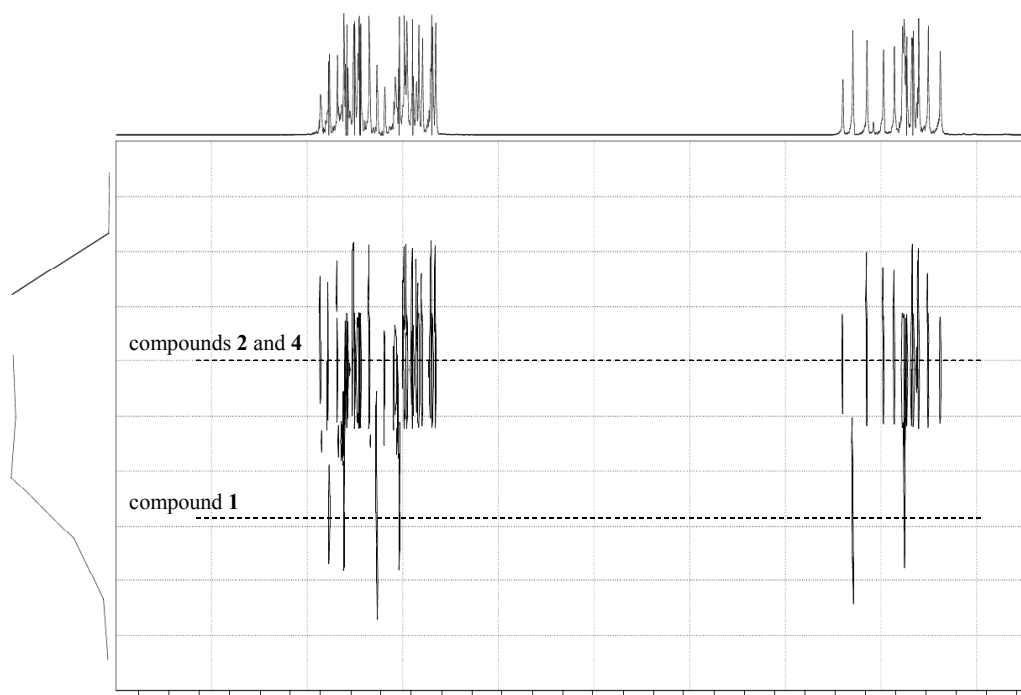

**Figure 2.**  $^1\text{H}$  DOSY spectrum of a mixture of **1**, **2**, and **4** in  $\text{CDCl}_3$ . The x- and y-axis represent the regular  $^1\text{H}$  chemical shift and the relative diffusion rate, respectively.
